# Supplementary material for: High ploidy large cytoplasmic megakaryocytes are hematopoietic stem cells regulators and essential for platelet production
Source: PubMed Central journal article supplement (PMC10102126; doi:10.1038/s41467-023-37780-7), 2023-04-13
Supplement: 41467_2023_37780_MOESM1_ESM.pdf [file 41467_2023_37780_MOESM1_ESM.pdf]

## **SUPPLEMENTARY INFORMATION**

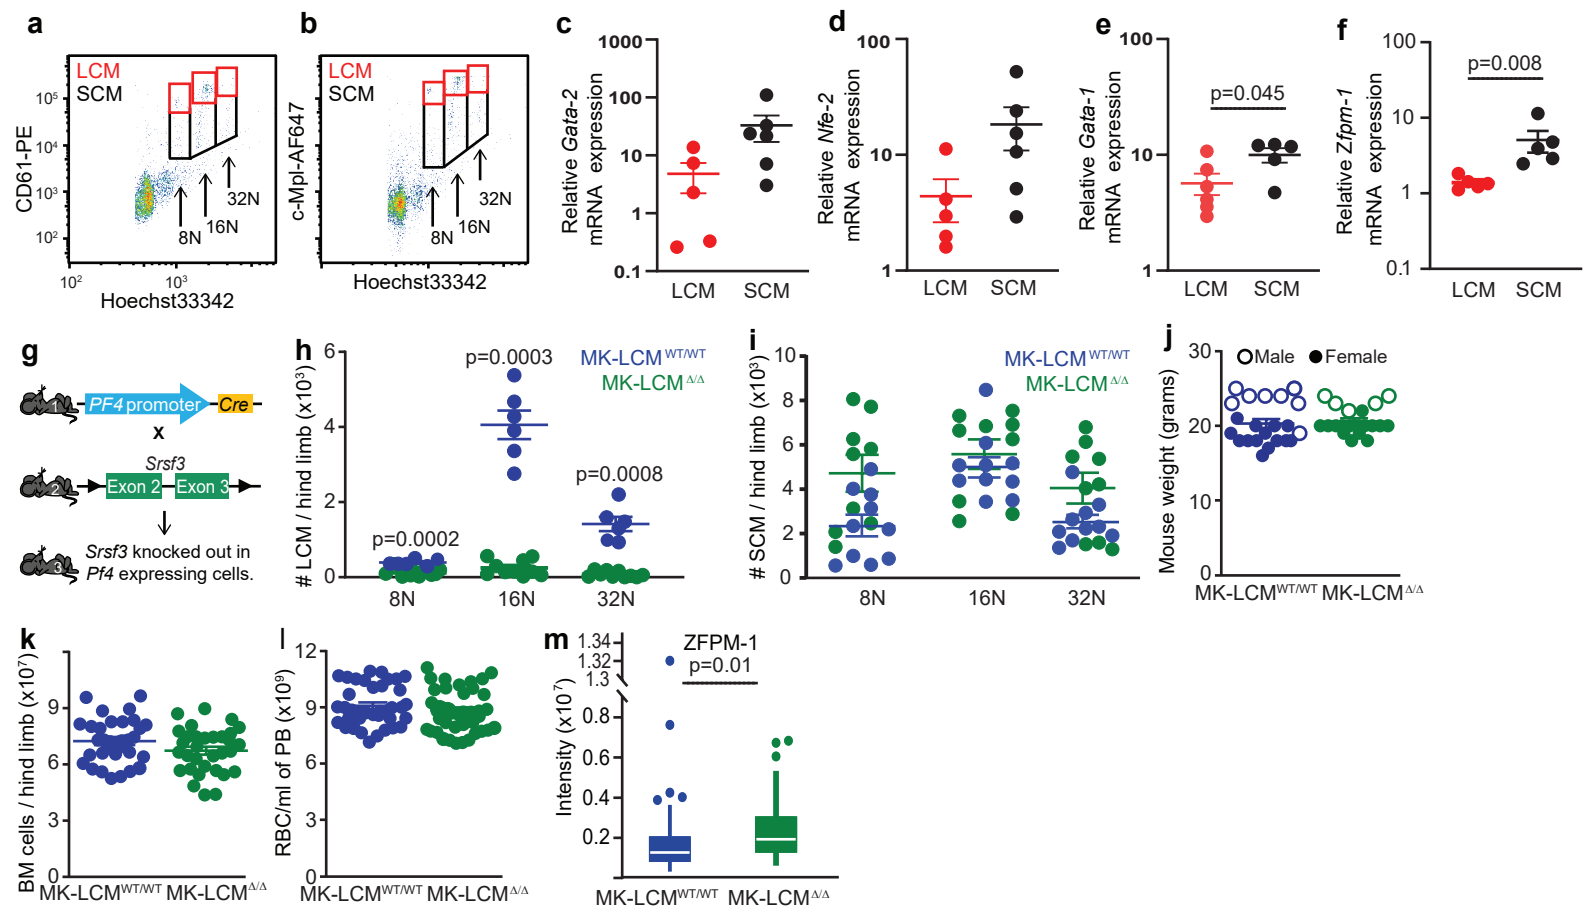

**Supplementary Fig. 1: MK of single ploidy exist as two distinct sub-populations.**

**(a)** Representative flow cytometric plot of MK separated by ploidy and further sub-fractionated using CD61 into CD61<sup>bright</sup> (LCM) and CD61<sup>dim</sup> (SCM). 8N LCM = 0.15%, 8N SCM = 0.38%, 16N LCM = 0.68%, 16N SCM = 0.84%, 32N LCM = 0.07%, 32N SCM = 0.35%. **(b)** c-MPL can also be used to separate MK into LCM and SCM. 8N LCM = 0.12%, 8N SCM = 0.44%, 16N LCM = 0.8%, 16N SCM = 0.91%, 32N LCM = 0.07%, 32N SCM = 0.4%. **(a,b):** representative plots from at least 7 biological replicates from  $\geq 2$  experiments). Percentages shown in flow plots are current gate as a percentage of the parent. **(c)** RT-PCR analysis of *Gata-2* expression in 16N LCM and 16N SCM (MK-LCM<sup>WT/WT</sup> n = 5, MK-LCM <sup>$\Delta/\Delta$</sup>  n = 6, biological replicates). **(d)** RT-PCR analysis of *Nfe-2* expression in 16N LCM and 16N SCM (MK-LCM<sup>WT/WT</sup> n = 5, MK-LCM <sup>$\Delta/\Delta$</sup>  n = 6, biological replicates). **(e)** RT-PCR analysis of *Gata-1* expression in 16N LCM and 16N SCM (MK-LCM<sup>WT/WT</sup> n = 6, MK-LCM <sup>$\Delta/\Delta$</sup>  n = 5, biological replicates). **(f)** RT-PCR analysis of *Zfpn-1* expression in 16N LCM and 16N SCM (MK-LCM<sup>WT/WT</sup> n = 5, MK-LCM <sup>$\Delta/\Delta$</sup>  n = 5, biological replicates). **(c-f):** Data relative to HSC mRNA expression of each target gene, from 2 experiments per gene). **(g)** MK-LCM <sup>$\Delta/\Delta$</sup> , *Pf-4-Cre-Srsf3* KO mouse model. **(h)** Absolute number of LCM per mouse hind limb (MK-LCM<sup>WT/WT</sup> n = 6, MK-LCM <sup>$\Delta/\Delta$</sup>  n = 10, biological replicates from  $\geq 2$  experiments). **(i)** Absolute number of SCM per hind limb (MK-LCM<sup>WT/WT</sup> n = 10, MK-LCM <sup>$\Delta/\Delta$</sup>  n = 9, biological replicates from  $\geq 2$  experiments). **(j)** Body weights of MK-LCM<sup>WT/WT</sup> and MK-LCM <sup>$\Delta/\Delta$</sup>  mice (Female: MK-LCM<sup>WT/WT</sup> n = 14, MK-LCM <sup>$\Delta/\Delta$</sup>  n = 15, Male: MK-LCM<sup>WT/WT</sup> n = 8, MK-LCM <sup>$\Delta/\Delta$</sup>  n = 5, biological replicates from 8 experiments). **(k)** BM cellularity in the hind limb of MK-LCM<sup>WT/WT</sup> and MK-LCM <sup>$\Delta/\Delta$</sup>  mice (MK-LCM<sup>WT/WT</sup> n = 31, MK-LCM <sup>$\Delta/\Delta$</sup>  n = 30, biological replicates from 8 experiments). **(l)** Red blood cell counts in MK-LCM<sup>WT/WT</sup> and MK-LCM <sup>$\Delta/\Delta$</sup>  mice (MK-LCM<sup>WT/WT</sup> n = 38, MK-LCM <sup>$\Delta/\Delta$</sup>  n = 39, biological replicates from 8 experiments). **(m)** ZFPM-1 protein level in MK-

LCM<sup>WT/WT</sup> and MK-LCM<sup>Δ/Δ</sup> BM. Data generated in MSqRob (n =3 biological replicates from 1 experiment, assessed 9 different peptide sequences, ≥ 45 reads per sample group, unpaired two-sided Student's t-test). Mean (line), 1<sup>st</sup>/3<sup>rd</sup> quartiles (box), range (vertical line). Statistical analysis was performed using unpaired two-sided Student's t-test, p-values indicated for **(e)**, unpaired two-sided Mann-Whitney test **(f)**, Two-Way ANOVA with Geisser-Greenhouse correction, p<0.0001 (overall) with individual groups for each timepoint compared using Holm-Sidak multiple comparisons test, p-values indicated for **(h)**. Source data are provided as a Source Data File. Error bars = SEM.

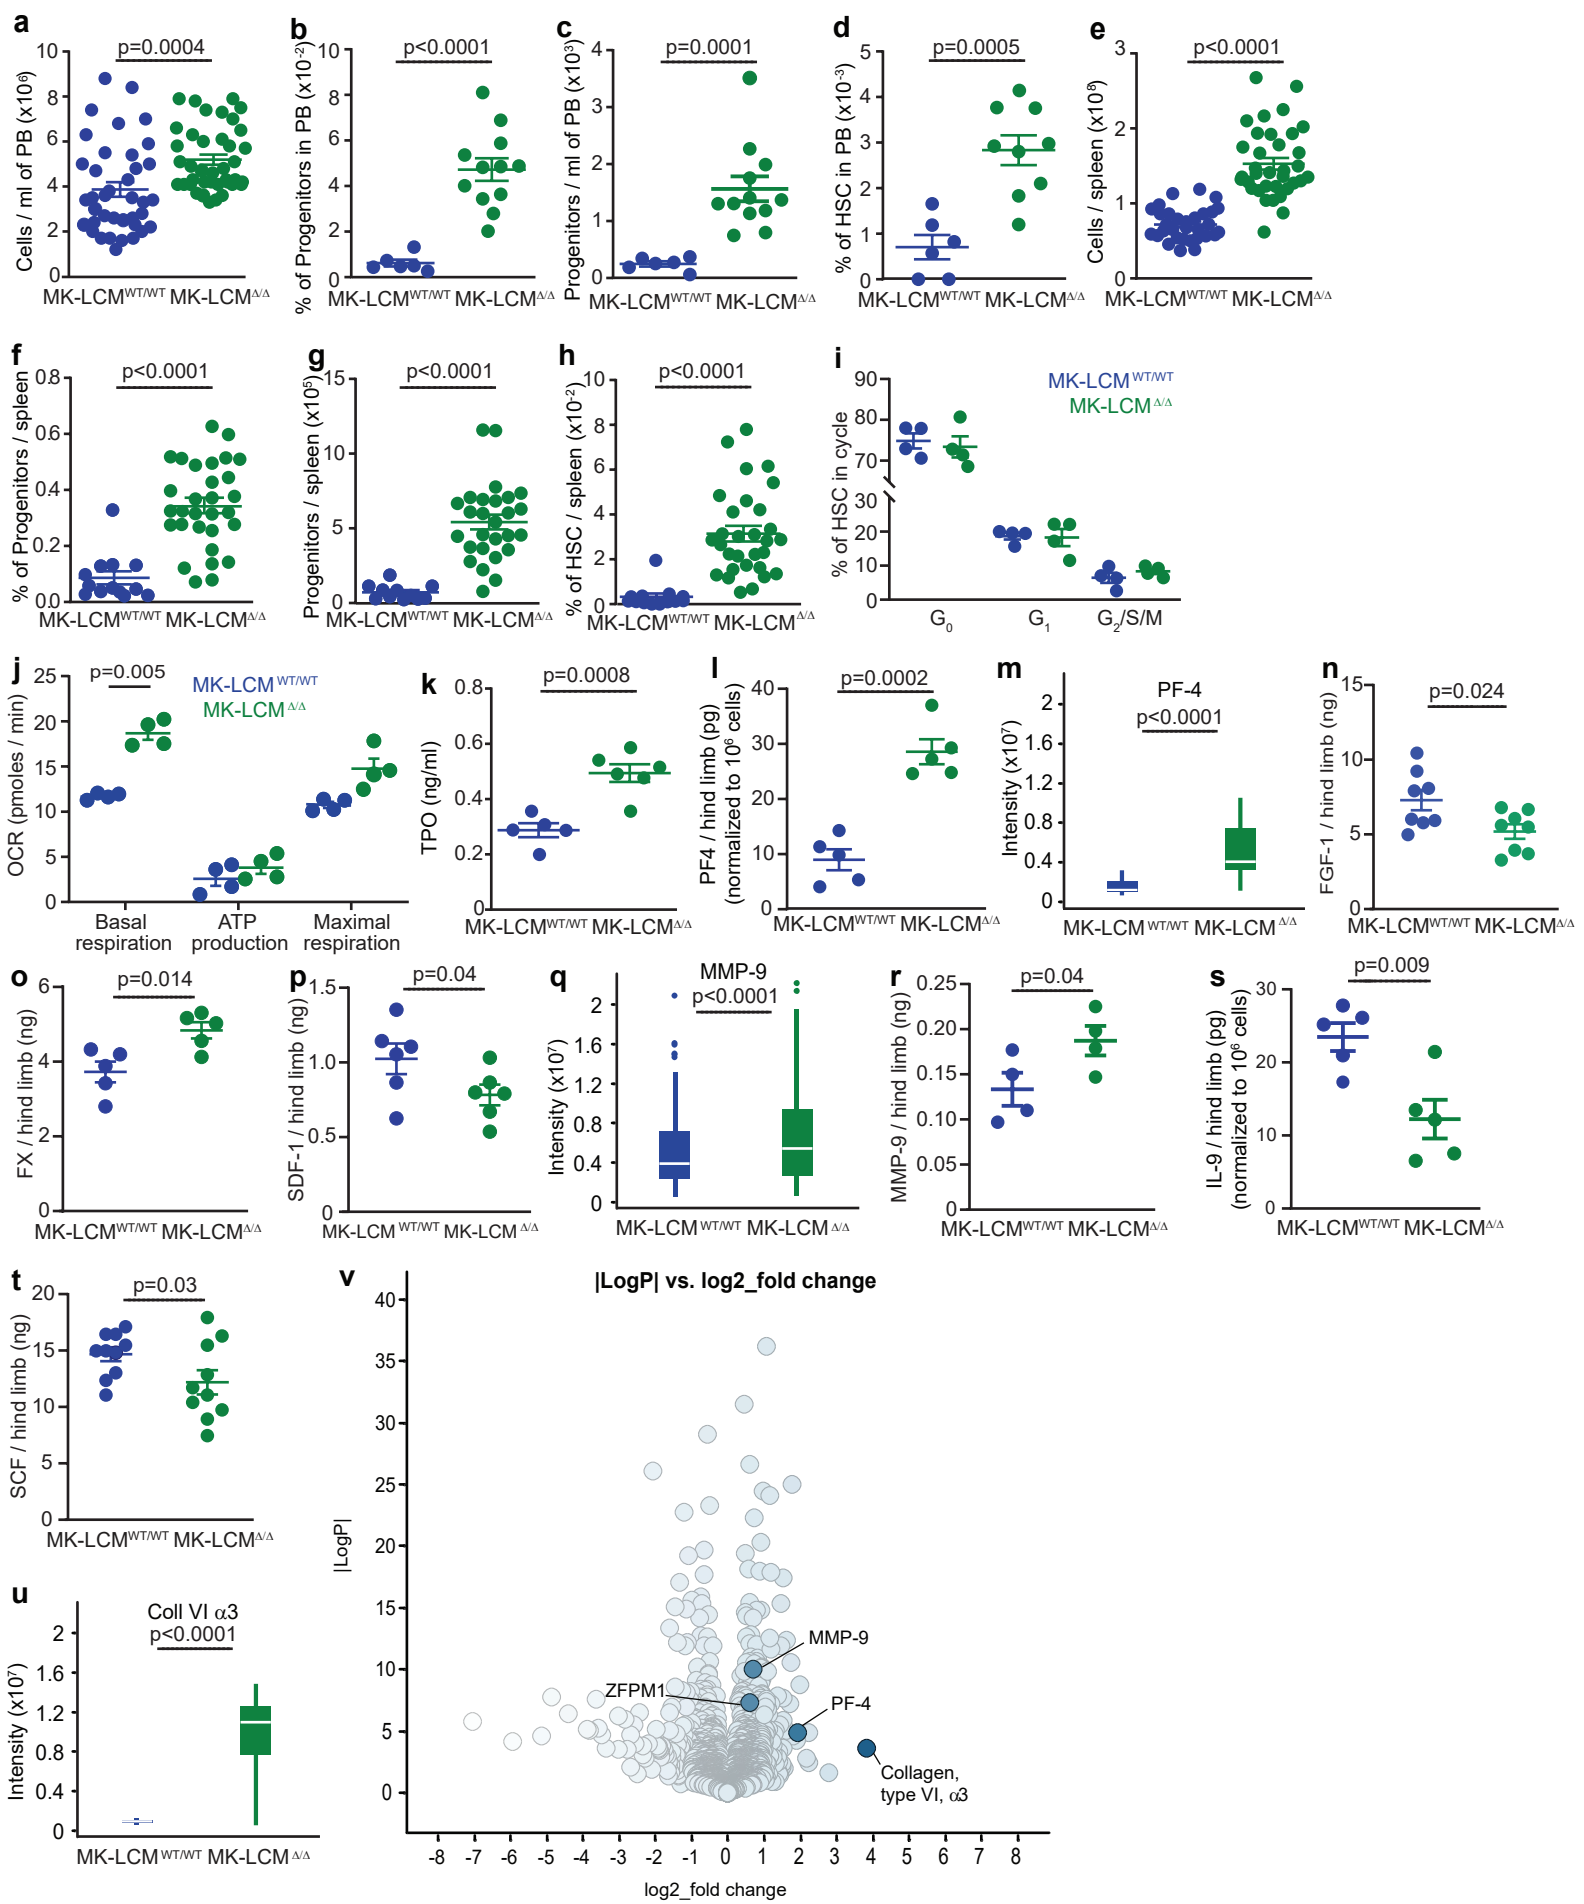

## Supplementary Fig. 2: Murine model with diminished LCM in the BM.

**(a)** PB white cell count in MK-LCM<sup>WT/WT</sup> and MK-LCM<sup>Δ/Δ</sup> mice (MK-LCM<sup>WT/WT</sup> n = 38, MK-LCM<sup>Δ/Δ</sup> n = 39, biological replicates from 8 experiments). **(b)** Frequency of LSK in blood, **(c)** number of LSK in PB and **(d)** frequency of HSC in PB (**b,c:** MK-LCM<sup>WT/WT</sup> n = 6, MK-LCM<sup>Δ/Δ</sup> n = 12, **d:** MK-LCM<sup>WT/WT</sup> n = 6, MK-LCM<sup>Δ/Δ</sup> n = 9, biological replicates from ≥2 experiments). **(e)** Spleen cellularity in MK-LCM<sup>WT/WT</sup> and MK-LCM<sup>Δ/Δ</sup> mice (MK-LCM<sup>WT/WT</sup> n = 31, MK-LCM<sup>Δ/Δ</sup> n = 35, biological replicates from 7 experiments). **(f)** Frequency of LSK in spleen (MK-LCM<sup>WT/WT</sup> n = 13, MK-LCM<sup>Δ/Δ</sup> n = 30, biological replicates from 7 experiments), **(g)** number of LSK in spleen (MK-LCM<sup>WT/WT</sup> n = 11, MK-LCM<sup>Δ/Δ</sup> n = 27, biological replicates from 7 experiments) and **(h)** frequency of HSC in spleen (MK-LCM<sup>WT/WT</sup> n = 13, MK-LCM<sup>Δ/Δ</sup> n = 30, biological replicates from 7 experiments). **(i)** Frequency of cHSC cycling in MK-LCM<sup>WT/WT</sup> and MK-LCM<sup>Δ/Δ</sup> BM. **(j)** Metabolic activity of MK-LCM<sup>WT/WT</sup> and MK-LCM<sup>Δ/Δ</sup> hematopoietic stem and progenitors (seahorse assay). **(i,j:** n = 4, representative data of 2 experiments and eHSC data). **(k)** TPO concentration in the plasma of MK-LCM<sup>WT/WT</sup> and MK-LCM<sup>Δ/Δ</sup> mice (MK-LCM<sup>WT/WT</sup> n = 5, MK-LCM<sup>Δ/Δ</sup> n = 6, biological replicates from 2 experiments). **(l)** Cytokine array data showing PF4 levels in MK-LCM<sup>WT/WT</sup> and MK-LCM<sup>Δ/Δ</sup> BM fluid (MK-LCM<sup>WT/WT</sup> n = 5, MK-LCM<sup>Δ/Δ</sup> n = 5, biological replicates from 1 experiment). **(m)** Proteomic analysis for PF-4 in the BM of MK-LCM<sup>WT/WT</sup> and MK-LCM<sup>Δ/Δ</sup> mice. Data generated in MSqRob (n = 3 biological replicates from 1 experiment, assessed 2 different peptide sequences, ≥ 10 reads per sample group, unpaired two-sided Student's t-test). Mean (line), 1<sup>st</sup>/3<sup>rd</sup> quartiles (box), range (vertical line). **(n)** Concentration of FGF-1 in the BM fluid of MK-LCM<sup>WT/WT</sup> and MK-LCM<sup>Δ/Δ</sup> mice (LCM<sup>WT/WT</sup> n = 8, MK-LCM<sup>Δ/Δ</sup> n = 8, biological replicates from 2 experiments). **(o)** FX concentration in the BM of MK-LCM<sup>WT/WT</sup> and MK-LCM<sup>Δ/Δ</sup> mice (LCM<sup>WT/WT</sup> n = 5, MK-LCM<sup>Δ/Δ</sup> n = 5, biological replicates from 2 experiments). **(p)** Concentration of SDF-1 in the

BM fluid of MK-LCM<sup>WT/WT</sup> and MK-LCM<sup>Δ/Δ</sup> mice (LCM<sup>WT/WT</sup> n = 6, MK-LCM<sup>Δ/Δ</sup> n = 6, biological replicates from 2 experiments, one-tailed t-test). **(q)** MMP-9 protein in MK-LCM<sup>WT/WT</sup> and MK-LCM<sup>Δ/Δ</sup> BM. Proteomics data generated in MSqRob (n = 3 biological replicates from 1 experiment, assessed 13 different peptide sequences, ≥ 74 reads per sample group, unpaired two-sided Student's t-test). Mean (line), 1<sup>st</sup>/3<sup>rd</sup> quartiles (box), range (vertical line). **(r)** Concentration of MMP-9 in the BM fluid of MK-LCM<sup>WT/WT</sup> and MK-LCM<sup>Δ/Δ</sup> mice (ELISA, LCM<sup>WT/WT</sup> n = 4, MK-LCM<sup>Δ/Δ</sup> n = 4, biological replicates from 1 experiment, one-tailed t-test). **(s)** Cytokine array data analysing the concentration of IL-9 in the BM fluid of MK-LCM<sup>WT/WT</sup> and MK-LCM<sup>Δ/Δ</sup> mice (LCM<sup>WT/WT</sup> n = 5, MK-LCM<sup>Δ/Δ</sup> n = 5, biological replicates from 1 experiment). **(t)** Concentration of SCF in the BM fluid of MK-LCM<sup>WT/WT</sup> and MK-LCM<sup>Δ/Δ</sup> mice measured by ELISA (LCM<sup>WT/WT</sup> n = 10, MK-LCM<sup>Δ/Δ</sup> n = 10, biological replicates from 2 experiments, one-tailed t-test). **(u)** BM proteomics data for Coll VI α3, generated in MSqRob (n ≥ 1 individual mouse from 1 experiment, assessed 2 different peptide sequences, ≥ 1 reads per sample group, unpaired two-sided Student's t-test). Mean (thin line), 1<sup>st</sup>/3<sup>rd</sup> quartiles (box), range (vertical line). **(v)** Volcano plot of protein changes in the BM fluid of MK-LCM<sup>WT/WT</sup> and MK-LCM<sup>Δ/Δ</sup> mice from 1 experiment. Statistical analysis was performed using unpaired two-sided Mann-Whitney test **(a,c,f,h)**, unpaired two-sided Student's t-test, p-values indicated for **(b,d,e,g,k,l,n,o,s)**, Two-Way ANOVA with Geisser-Greenhouse correction, p = 0.003 (overall) with individual groups for each timepoint compared using Holm-Sidak multiple comparisons test, p-values indicated for **(j)** or unpaired one-way t-test **(p,r,t)**. Source data are provided as a Source Data File. Error bars = SEM.

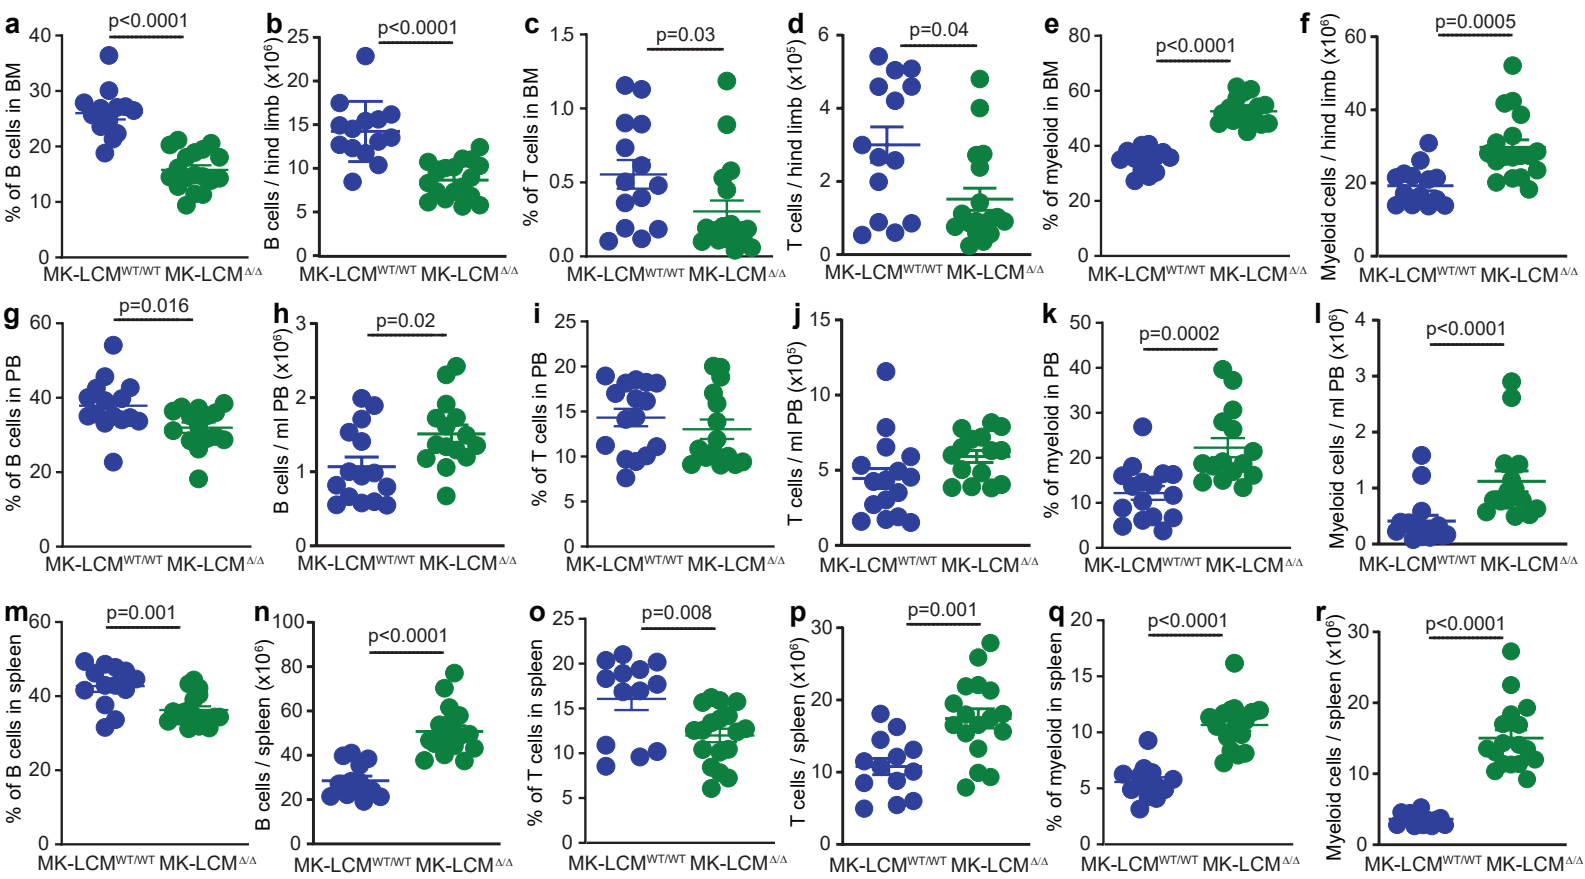



**Supplementary Fig. 3: Loss of LCM results in decreased lymphoid and increased myeloid cell frequencies in the BM, PB and spleen.**

**(a-f)** Frequencies and absolute numbers of B-, T- and myeloid cells in BM (LCM<sup>WT/WT</sup> n = 14, MK-LCM<sup>Δ/Δ</sup> n = 18, biological replicates from 4 experiments). **(g-l)** Frequencies and absolute numbers of B-, T- and myeloid cells in PB (LCM<sup>WT/WT</sup> n = 15, MK-LCM<sup>Δ/Δ</sup> n = 15, biological replicates, from 4 experiments). **(m-r)** Frequencies and absolute numbers of B-, T- and myeloid cells in spleen (LCM<sup>WT/WT</sup> n = 13, MK-LCM<sup>Δ/Δ</sup> n = 17, biological replicates, from 4 experiments). Statistical analysis was performed using unpaired two-sided Student's t-test, p-values indicated for **(a,b,e-g,m,n,p-r)** or unpaired two-sided Mann-Whitney test **(c,d,h,k,l,o)**. Source data are provided as a Source Data File. Error bars = SEM.

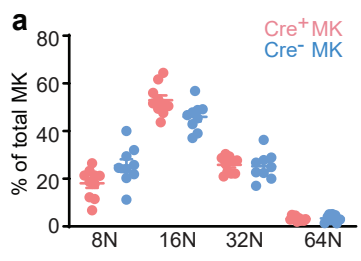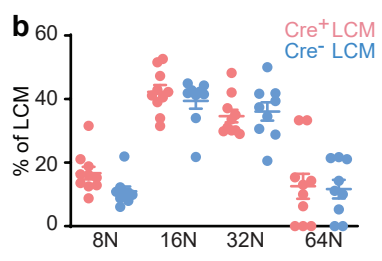

#### **Supplementary Fig. 4: LCM and SCM populations**

MK ploidy distribution **(a)** and frequency of LCM **(b)** in *Pf4-Cre Stop<sup>fl/fl</sup>tdTomato* mice; where *Pf4* drives the expression of tdTomato in Cre<sup>+</sup> mice (Cre<sup>+</sup> n = 10, Cre<sup>-</sup> n = 9, biological replicates, from 2 experiments). Statistical analysis was performed using Two-Way ANOVA (NS). Source data are provided as a Source Data File. Error bars = SEM.

**Supplementary Table 1: Anti-human antibodies**

| <b>Target Protein</b> | <b>Fluorophore</b> | <b>Clone</b> | <b>Isotype</b> | <b>Supplier</b> | <b>Cat #</b> | <b>Conc.</b> |
|-----------------------|--------------------|--------------|----------------|-----------------|--------------|--------------|
| CD41                  | AF700              | HIP8         | Mouse<br>IgG1  | Biologend       | 303728       | 0.5µg/ml     |
|                       | APC                | HIP8         | Mouse<br>IgG1  | BD              | 559777       | 0.3µg/ml     |
| Mac-1,<br>CD11b       | Pure               | ICRF44       | Mouse<br>IgG   | BD              | 555386       | 1µg/ml       |
| CD14                  | Pure               | M5E2         | Mouse<br>IgG   | BD              | 555396       | 1µg/ml       |
| CD20                  | Pure               | 2H7          | Mouse<br>IgG2b | BD              | 555621       | 1µg/ml       |

**Supplementary Table 2: Anti-mouse antibodies**

| Target Protein        | Fluorophore | Clone            | Isotype               | Supplier  | Cat #    | Conc.                                                          |
|-----------------------|-------------|------------------|-----------------------|-----------|----------|----------------------------------------------------------------|
| CD3e                  | BV510       | 17A2             | rat IgG2b             | Biolegend | 100234   | 2µg/ml                                                         |
|                       | APC Cy7     | 17A2             | rat IgG2b             | BD        | 560590   | 0.5µg/ml                                                       |
| CD45R,<br>B220        | APCCy7      | RA3_6B2          | rat IgG2a             | BD        | 552094   | 0.5µg/ml                                                       |
|                       | BV510       | RA3_6B2          | rat IgG2a             | BD        | 563103   | 2µg/ml                                                         |
|                       | AF647       | RA3_6B2          | rat IgG2a             | Biolegend | 103226   | 1µg/ml                                                         |
|                       | purified    | RA3_6B2          | rat IgG2a             | BD        | 557390   | 1µg/ml                                                         |
| Gr-1, Ly-<br>6G/Ly-6C | APCCy7      | RB6-8C5          | rat IgG2b             | BD        | 557661   | 0.1µg/ml                                                       |
|                       | AF647       | RB6-8C5          | rat IgG2b             | Biolegend | 108418   | 0.1µg/ml                                                       |
|                       | purified    | RB6-8C5          | rat IgG2b             | BD        | 553123   | 1µg/ml                                                         |
| Mac-1,<br>CD11b       | APCCy7      | M1/70            | rat IgG2b             | BD        | 557657   | 0.5µg/ml                                                       |
|                       | AF647       | M1/70            | rat IgG2b             | Biolegend | 101218   | 0.1µg/ml                                                       |
|                       | purified    | M1/70            | rat IgG2b             | BD        | 553308   | 1µg/ml                                                         |
| CD117,<br>c-Kit       | BUV395      | 2B8              | rat IgG2b             | BD        | 564011   | 1µg/ml                                                         |
|                       | AF647       | 2B8              | rat IgG2b             | Biolegend | 105818   | 0.25µg/ml                                                      |
| Sca-1,<br>Ly-6A/E     | PECy7       | E13-161.7        | rat IgG2a             | Biolegend | 122514   | 0.4µg/ml                                                       |
| TER119                | purified    | TER119           | rat IgG2b             | BD        | 550565   | 0.1µg/ml                                                       |
| CD48                  | APC         | HM48-1           | A.                    | BD        | 562746   | 0.5µg/ml                                                       |
|                       | FITC        | HM48-1           | Hamster               | BD        | 557484   | 1µg/ml                                                         |
|                       | BV421       | HM48-1           | IgG1                  | BD        | 562745   | 1µg/ml                                                         |
|                       | BV510       | HM48-1           |                       | BD        | 563536   | 1µg/ml                                                         |
| CD150,<br>SLAMF1      | BV650       | TC15-<br>12F12.2 | rat IgG2a             | Biolegend | 115931   | 2µg/ml                                                         |
|                       | PE          | TC15-<br>12F12.2 | rat IgG2a             | Biolegend | 115904   | 1µg/ml                                                         |
|                       | Biotin      | TC15-<br>12F12.2 | rat IgG2a             | Biolegend | 115908   | 1µg/ml                                                         |
| CD41                  | AF700       | MWReg30          | Rat IgG1              | Biolegend | 133926   | 0.25µg/ml<br>(MK)<br>5µg/ml<br>(platelets)<br>10µg/ml<br>(HSC) |
| CD61                  | PE          | 2C9.G2           | A.<br>Hamster<br>IgG1 | BD        | 553347   | 5µg/ml                                                         |
| c-Mpl                 | Biotin      |                  | Goat IgG              | R&D       | AF1317   | 2µg/ml                                                         |
| α <sub>4</sub>        | BV605       | 9C10             | Rat IgG2a             | BD        | 745183   | 2µg/ml                                                         |
| α <sub>9</sub>        | PE          |                  | Goat IgG              | R&D       | FAB3827P | 0.5µg/ml                                                       |
| CXCR-4                | AF647       | L276F12          | Rat gG2b              | Biolegend | 146503   | 2.5µg/ml                                                       |

|            |        |        |            |                  |          |          |
|------------|--------|--------|------------|------------------|----------|----------|
| Tom20      | Pure   | FL-145 | Rabbit IgG | Santa Cruz       | SC-11415 | 0.5µg/ml |
| VWF        | Pure   |        | Rabbit IgG | Abcam            | Ab9378   | 8µg/ml   |
| Ki67       | BV786  | B56    | Mouse IgG  | BD               | 563756   | 1 in 10  |
| Rabbit-IgG | AF568  |        |            | Invitrogen       | A-11011  | 10µg/ml  |
| Goat-IgG   | AF647  |        |            | Molecular Probes | A21447   | 2µg/ml   |
| SAV        | AF647  |        |            | Biolegend        | 405237   | 0.5µg/ml |
| SAV        | BUV805 |        |            | BD               | 564923   | 1µg/ml   |

**Supplementary Table 3: Peptides used in the proteomics analysis:**

|        |                          |
|--------|--------------------------|
| MMP-9  | DMIDDAFAR                |
|        | GSPLQGPFLTAR             |
|        | GVVIPTYYGNSNGAPCHFPFTEGR |
|        | LGLGPEVTHVSGLLPR         |
|        | QLSLPQTGELDSQTLK         |
|        | QPTFVVFPK                |
|        | QSLRPALLMLQK             |
|        | SLDKLGLGPEVTHVSGLLPR     |
|        | SQKVDPQSVIR              |
|        | TWPALPATLDSAFEDPQTKR     |
|        | VDKEFSGVPWNSHDIFQYQDK    |
|        | VDPQSVIR                 |
|        | VFFFSGR                  |
| PF-4   | HITSLEVIK                |
|        | TISSGIHLK                |
| ZFPM-1 | APAGAAAEPDPSR            |
|        | GEIYSPGAGHPAAK           |
|        | GPPAPAPAPGGGGGHR         |
|        | LQQGAGSSGAAGTPTGLFSGTK   |
|        | LVTEPHGAPR               |
|        | QAHGLQVAKPAASPGAEP       |
|        | RPPAPTAPGPAAPALTAPPVR    |
|        | VEAAEEPEATR              |
|        | VRGDLVEHLR               |
| Col6a3 | EVQVSEVTENSAR            |
|        | PAPAQPVLAK               |
